# Supplementary material
Source: Springer Nature journal article supplement (https://www.springermedizin.de/resource/supplementary/13012_2009_222_MOESM1_ESM.pdf/9629654)

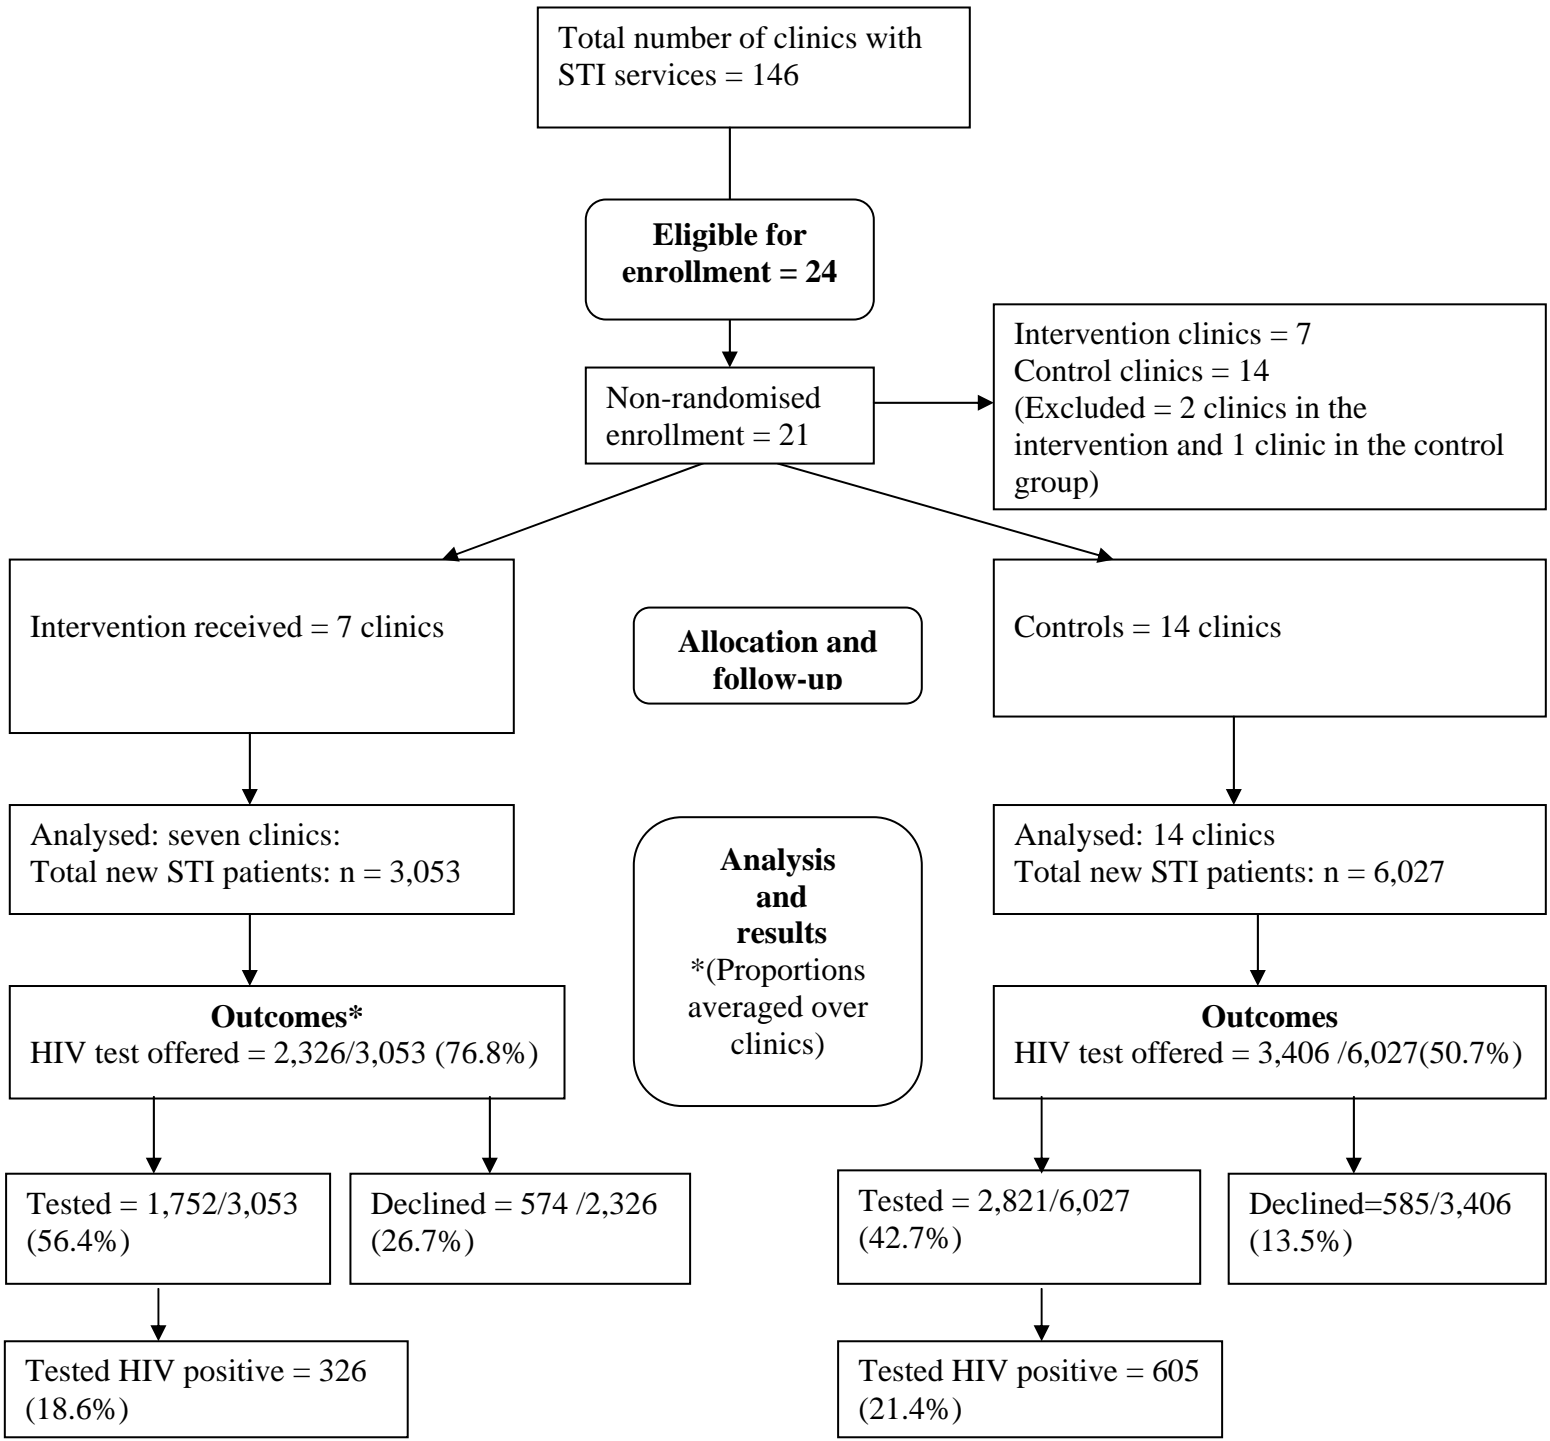

Supplement: MOESM1 [file 9629654]
